# Supplementary material for: A water-stable open-framework zirconium(iv) phosphate and its water-assisted high proton conductivity
Source: Royal Society of Chemistry journal article supplement (doi:10.1039/d1ce00852h), 2021-01-01
Supplement: d1ce00852h2.pdf [file d1ce00852h2.pdf]

## Supporting Information

### **Title: A water-stable open-framework zirconium(IV) phosphate and its water-assisted high proton conduct**

Jing-Wei Yu,<sup>a</sup> Hai-Jiao Yu,<sup>a</sup> Zhi-Yuan Yao,<sup>a</sup> Zi-Han Li,<sup>a</sup> Qiu Ren,<sup>a</sup> Hong-Bin Luo,<sup>a</sup> Yang Zou,<sup>\*a</sup>  
Lifeng Wang,<sup>b</sup> Xiao-Ming Ren<sup>a,c</sup>

<sup>a</sup> State Key Laboratory of Materials-Oriented Chemical Engineering and College of Chemistry and Molecular Engineering, Nanjing Tech University, Nanjing 211816, P. R. China

<sup>b</sup> Institute for Frontier Materials (IFM), Deakin University, 75 Pigdons Road, Waurin Ponds, Victoria 3216, Australia

<sup>c</sup> State Key Laboratory of Coordination Chemistry, Nanjing University 210023, P. R. China

Tel: +86-25-58139476

E-mail: [zouyang@njtech.edu.cn](mailto:zouyang@njtech.edu.cn) (YZ)

Contents:

#### **X-ray crystallography**

[Table S1](#). Crystallographic data and structural refinements for **ZrP**.

[Table S2](#). Selected Bond Lengths (Å) and Bond Angles (°) for **ZrP**

[Table S3](#). Distances [Å] and angles [°] of selected hydrogen bonding for **ZrP**

[Figure S1](#). (a) View of the crystal structure of **ZrP** along the *b* axis. ZrO<sub>4</sub>F<sub>2</sub> and PO<sub>4</sub> are shown as aqua octahedra and purple tetrahedra respectively. Other atom colour codes: O, red; N, blue; F, green, (b) View of the dense hydrogen-bond network (yellow dash line) in **ZrP** and (c) 2D hydrogen-bond network.

[Figure S2](#). TGA of **ZrP** under nitrogen atmosphere.

#### **Calculation of ion conductivity from Impedance spectra by fitting with equivalent circuit (RQ) Q**

[Figure S3](#). Humidity-dependent proton conductivity of **ZrP** at room temperature.

[Table S4](#). Table of fitting parameters to determine the conductivity of **ZrP** under N<sub>2</sub> atmosphere in various temperatures using ZSimpWin software.

[Table S5](#). Table of fitting parameters to determine the conductivity of **ZrP** under various RH at room temperature (25 °C) using Gamry Echem Analyst software.

[Table S6](#). Table of proton conductivity of **ZrP** under 98%RH\_in various temperatures using Gamry Echem Analyst software.

[Table S7](#). List of proton conducting materials reported under high humidity at ambient temperature.

## References

## X-ray crystallography

Single crystal X-ray diffraction data for **ZrP** were collected at 273.15 K using graphite monochromated Mo/K $\alpha$  radiation ( $\lambda=0.71073$  Å) on a Bruker Apex III CCD area detector diffractometer. Data reduction and absorption corrections were performed with the SAINT [1] and SADABS [2] software packages, respectively. The structures were solved by a direct method using the SHELXL-2014/7 software package. [3]

The non-hydrogen atoms were anisotropically refined using the full-matrix least-squares method on F<sub>2</sub>. All the hydrogen atoms were geometrically fixed and placed in ideal positions. CSD 2092514

(ZrP) contain the supplementary crystallographic data for this paper. The details about data collection, structural refinement and crystallography are listed in [Table S1](#).

**Table S1.** Crystallographic data and structural refinements for **ZrP**.

|                                                                        |                                                                                                |
|------------------------------------------------------------------------|------------------------------------------------------------------------------------------------|
| Formula                                                                | Zr <sub>6</sub> N <sub>10</sub> O <sub>30</sub> F <sub>12</sub> P <sub>6</sub> H <sub>48</sub> |
| Formula weight                                                         | 1629.62                                                                                        |
| CSD no.                                                                | 2092514                                                                                        |
| Temperature (K)                                                        | 273.15                                                                                         |
| Wavelength (Å)                                                         | 0.71073                                                                                        |
| Crystal size/mm                                                        | 0.21 × 0.18 × 0.12                                                                             |
| Crystal system                                                         | Monoclinic                                                                                     |
| Space group                                                            | P2 <sub>1</sub> /n                                                                             |
| a/Å                                                                    | 15.502(2)                                                                                      |
| b/Å                                                                    | 7.5316(11)                                                                                     |
| c/Å                                                                    | 19.141(3)                                                                                      |
| α/(°)                                                                  | 90                                                                                             |
| β/(°)                                                                  | 102.593(4)                                                                                     |
| γ/(°)                                                                  | 90                                                                                             |
| V/Å <sup>3</sup>                                                       | 2181.0(6)                                                                                      |
| Z                                                                      | 2                                                                                              |
| F(000)                                                                 | 1592.0                                                                                         |
| θ <sub>min,max</sub> /°                                                | 3.072 to 55.286                                                                                |
| GOF                                                                    | 1.078                                                                                          |
| R <sub>1</sub> , <sup>a</sup> wR <sub>2</sub> <sup>b</sup> [I > 2σ(I)] | R <sub>1</sub> = 0.0315, wR <sub>2</sub> = 0.1019                                              |
| Largest diff. peak/hole / e Å <sup>-3</sup>                            | 0.81/-1.18                                                                                     |

**Table S2.** Selected Bond Lengths (Å) and Bond Angles (°) for **ZrP**

|             | Bond Length/Å |                         | Bond Length/Å |
|-------------|---------------|-------------------------|---------------|
| Zr(1)-F(1)  | 2.017(2)      | Zr(3)-O(4) <sup>2</sup> | 2.086(3)      |
| Zr(1)-F(2)  | 1.994(2)      | Zr(3)-O(3) <sup>3</sup> | 2.106(3)      |
| Zr(1)-O(10) | 2.035(3)      | Zr(3)-O(3W)             | 1.957(2)      |
| Zr(1)-O(1)  | 2.065(3)      | P(1)-O(1)               | 1.515(3)      |
| Zr(1)-O(5)  | 2.076(3)      | P(1)-O(4)               | 1.524(3)      |
| Zr(1)-O(1W) | 1.995(3)      | P(1)-O(3)               | 1.521(3)      |
| Zr(2)-F(4)  | 2.006(2)      | P(1)-O(2)               | 1.534(3)      |
| Zr(2)-F(3)  | 2.004(2)      | P(2)-O(7)               | 1.527(3)      |
| Zr(2)-O(7)1 | 2.089(3)      | P(2)-O(6)               | 1.531(3)      |
| Zr(2)-O(6)  | 2.048(3)      | P(2)-O(8)               | 1.537(3)      |
| Zr(2)-O(9)  | 2.040(3)      | P(2)-O(5)               | 1.510(3)      |

|             |          |            |          |
|-------------|----------|------------|----------|
| Zr(2)-O(2W) | 2.005(2) | P(3)-O(10) | 1.530(3) |
| Zr(3)-F(5)  | 1.968(2) | P(3)-O(12) | 1.494(3) |
| Zr(3)-F(6)  | 2.004(2) | P(3)-O(9)  | 1.531(3) |
| Zr(3)-O(11) | 2.087(3) | P(3)-O(11) | 1.538(3) |

| Angle/°                       |            | Angle/°                       |            |
|-------------------------------|------------|-------------------------------|------------|
| F(1)-Zr(1)-O(10)              | 91.22(12)  | F(5)-Zr(3)-O(4) <sup>2</sup>  | 91.82(11)  |
| F(1)-Zr(1)-O(1)               | 86.20(12)  | F(5)-Zr(3)-O(3) <sup>3</sup>  | 179.71(12) |
| F(1)-Zr(1)-O(5)               | 83.72(12)  | F(6)-Zr(3)-O(11)              | 175.73(11) |
| F(2)-Zr(1)-F(1)               | 92.43(11)  | F(6)-Zr(3)-O(4) <sup>2</sup>  | 91.55(11)  |
| F(2)-Zr(1)-O(10)              | 86.64(12)  | F(6)-Zr(3)-O(3) <sup>3</sup>  | 88.47(12)  |
| F(2)-Zr(1)-O(1)               | 87.35(13)  | O(11)-Zr(3)-O(3) <sup>3</sup> | 88.44(12)  |
| F(2)-Zr(1)-O(5)               | 176.05(13) | O(4)2-Zr(3)-O(11)             | 85.40(11)  |
| F(2)-Zr(1)-O(1W)              | 94.89(13)  | O(4)2-Zr(3)-O(3) <sup>3</sup> | 87.89(12)  |
| O(10)-Zr(1)-O(1)              | 173.35(13) | O(3W)-Zr(3)-F(5)              | 93.10(11)  |
| O(10)-Zr(1)-O(5)              | 92.61(12)  | O(3W)-Zr(3)-F(6)              | 92.33(10)  |
| O(1)-Zr(1)-O(5)               | 93.20(13)  | O(3W)-Zr(3)-O(11)             | 90.45(11)  |
| O(1W)-Zr(1)-F(1)              | 171.82(12) | O(3W)-Zr(3)-O(4) <sup>2</sup> | 173.65(11) |
| O(1W)-Zr(1)-O(10)             | 92.86(14)  | O(3W)-Zr(3)-O(3) <sup>3</sup> | 87.19(12)  |
| O(1W)-Zr(1)-O(1)              | 90.47(14)  | O(1)-P(1)-O(4)                | 110.33(18) |
| O(1W)-Zr(1)-O(5)              | 89.02(13)  | O(1)-P(1)-O(3)                | 108.82(18) |
| F(4)-Zr(2)-O(7) <sup>1</sup>  | 86.93(10)  | O(1)-P(1)-O(2)                | 108.31(18) |
| F(4)-Zr(2)-O(6)               | 175.24(11) | O(4)-P(1)-O(2)                | 108.63(17) |
| F(4)-Zr(2)-O(9)               | 90.01(11)  | O(3)-P(1)-O(4)                | 109.95(16) |
| F(3)-Zr(2)-F(4)               | 91.70(11)  | O(3)-P(1)-O(2)                | 110.79(19) |
| F(3)-Zr(2)-O(7) <sup>1</sup>  | 89.15(11)  | O(7)-P(2)-O(6)                | 109.92(16) |
| F(3)-Zr(2)-O(6)               | 91.55(12)  | O(7)-P(2)-O(8)                | 108.98(16) |
| F(3)-Zr(2)-O(9)               | 91.79(11)  | O(6)-P(2)-O(8)                | 109.08(18) |
| F(3)-Zr(2)-O(2W)              | 175.31(10) | O(5)-P(2)-O(7)                | 109.57(17) |
| O(6)-Zr(2)-O(7) <sup>1</sup>  | 89.64(11)  | O(5)-P(2)-O(6)                | 109.66(17) |
| O(9)-Zr(2)-O(7) <sup>1</sup>  | 176.82(11) | O(5)-P(2)-O(8)                | 109.62(19) |
| O(9)-Zr(2)-O(6)               | 93.37(12)  | O(10)-P(3)-O(9)               | 108.64(17) |
| O(2W)-Zr(2)-F(4)              | 88.19(11)  | O(10)-P(3)-O(11)              | 106.53(17) |
| O(2W)-Zr(2)-O(7) <sup>1</sup> | 86.16(10)  | O(12)-P(3)-O(10)              | 112.06(19) |
| O(2W)-Zr(2)-O(6)              | 88.30(12)  | O(12)-P(3)-O(9)               | 109.75(19) |
| O(2W)-Zr(2)-O(9)              | 92.90(11)  | O(12)-P(3)-O(11)              | 111.09(18) |
| F(5)-Zr(3)-F(6)               | 91.58(11)  | O(9)-P(3)-O(11)               | 108.65(17) |
| F(5)-Zr(3)-O(11)              | 91.49(12)  |                               |            |

Symmetry operators:<sup>1</sup>1-x,1-y,1-z; <sup>2</sup>1/2+x,3/2-y,1/2+z; <sup>3</sup>1/2-x,-1/2+y,3/2-z;

**Table S3.** Distances [ $\text{\AA}$ ] and angles [ $^{\circ}$ ] of selected hydrogen bonding for **ZrP**

| D-H...A        | d(D-H) | d(H...A) | d(D...A) | $\angle$ D-H...A |
|----------------|--------|----------|----------|------------------|
| N1-H1A...F1    | 0.9    | 1.91     | 2.806(5) | 172              |
| N1-H1B...O8    | 0.9    | 2.2      | 3.099(5) | 173              |
| N1-H1D...O2W#1 | 0.9    | 2.36     | 2.869(4) | 116              |
| N1-H1D...F6#2  | 0.9    | 2.27     | 2.913(5) | 128              |
| O1W-H1W...N1#3 | 0.85   | 2.46     | 2.952(5) | 117              |
| N2-H2A...O12   | 0.9    | 1.91     | 2.786(5) | 165              |
| N2-H2B...F1    | 0.9    | 1.99     | 2.866(4) | 165              |
| N2-H2D...F2#4  | 0.9    | 2.44     | 2.849(4) | 108              |
| O2W-H2W...F4   | 0.85   | 2.5      | 2.791(3) | 101              |
| N3-H3A...F2    | 0.9    | 1.93     | 2.824(4) | 169              |
| N3-H3B...O11   | 0.9    | 2.13     | 3.018(4) | 169              |
| N3-H3D...O2#4  | 0.9    | 2.1      | 2.939(5) | 154              |
| O3W-H3W...F4   | 0.85   | 2.49     | 3.293(3) | 157              |
| N4-H4A...F5    | 0.9    | 1.93     | 2.814(4) | 165              |
| N4-H4B...O12   | 0.9    | 1.93     | 2.813(5) | 165              |
| N4-H4C...O2W#5 | 0.85   | 2.13     | 2.977(4) | 179              |
| N4-H4D...O2#6  | 0.9    | 2.38     | 3.209(5) | 153              |
| N5-H5A...F4    | 0.9    | 2.02     | 2.809(4) | 146              |
| N5-H5B...O12#3 | 0.9    | 2.38     | 3.058(5) | 132              |
| N5-H5C...F4#7  | 0.9    | 2.27     | 2.894(5) | 126              |
| N5-H5D...O8#8  | 0.85   | 2.53     | 3.166(5) | 132              |

Symmetry operators: #1: 1-x,2-y,1-z; #2: -1/2+x,3/2-y,-1/2+z; #3: x,-1+y,z; #4: 1/2-x,1/2+y,3/2-z; #5: 3/2-x,1/2+y,3/2-z; #6: 1/2+x,3/2-y,1/2+z; #7: 3/2-x,-1/2+y,3/2-z; #8: 1-x,1-y,1-z.

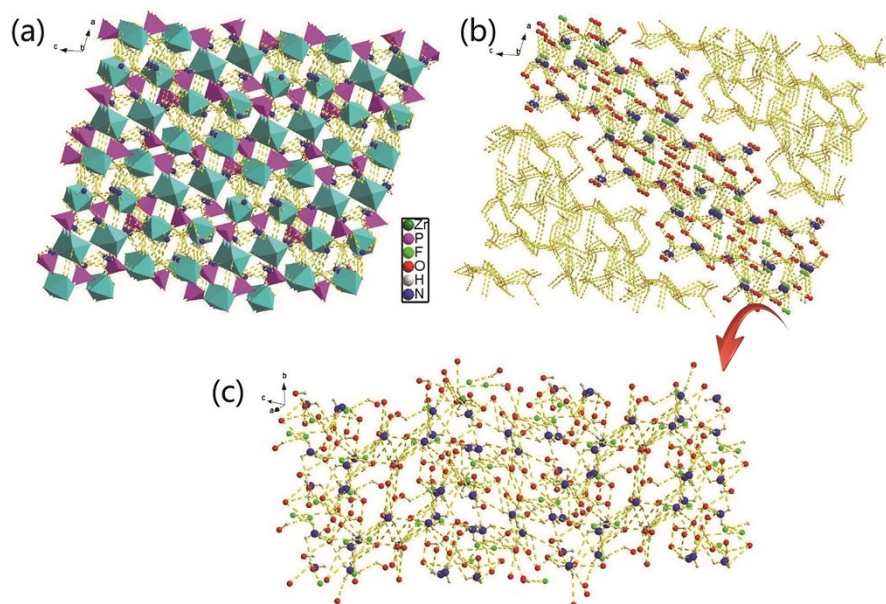

**Figure S1.** (a) View of the crystal structure of **ZrP** along the  $b$  axis.  $\text{ZrO}_4\text{F}_2$  and  $\text{PO}_4$  are shown as aqua octahedra and purple tetrahedra respectively. Other atom colour codes: O, red; N, blue; F, green, (b) View of the dense hydrogen-bond network (yellow dash line) in **ZrP** and (c) 2D hydrogen-bond network.

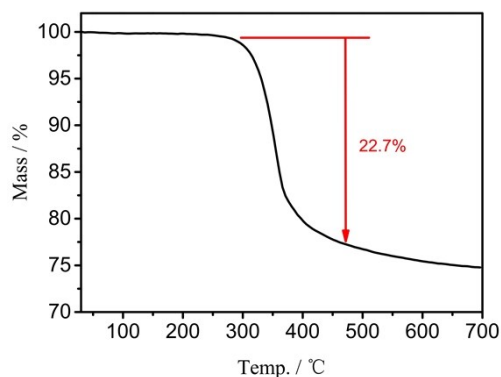

**Figure S2.** TGA of **ZrP** under nitrogen atmosphere. (471°C)

**Calculation of ion conductivity from Impedance spectra by fitting with equivalent circuit (RQ)Q**

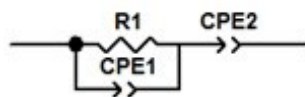

**Scheme S1.** Equivalent circuit (RQ)Q.

The possible behaviour of the electrode-electrolyte interfaces can be discussed in terms of blocking or non-blocking character. An interface is blocking concerning the given charge-carrying species in the electrolyte if those species cannot cross the interface or exchange charge (in the electron form) with the electrode; otherwise, it is non-blocking with respect to the given species. For the EIS tests with blocking electrodes, the equivalent circuits are shown in [Scheme 1](#), where R1 represents the bulk resistance, while CPE1 and CPE2 are the constant phase elements for the non-ideal capacitance behaviour of bulk and electrodes, respectively. [4, 5] It consists of the contributions of the bulk and the electrodes, as is reflected in the Nyquist plot that involves a high-frequency semicircle and a low-frequency tail. The bulk resistance R1 can be estimated by either fitting to the equivalent circuit or by the method of low-frequency minimum/intercept along the real Z-axis.

Here we provide the values of R1 by fitting the experimentally obtained data points along with the curve generated by the equivalent circuit mentioned above. The conductivity ( $\sigma$ ) was calculated using the equation of  $\sigma = L/RS$ , where the symbols  $\sigma$ , R, L and S represent the conductivity, resistance, thickness and cross-sectional area of the sample, respectively.

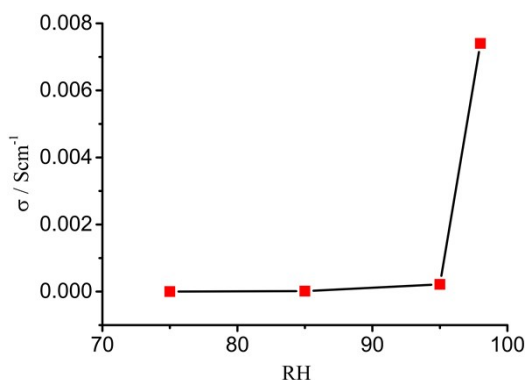

**Figure S3.** Humidity-dependent proton conductivity of **ZrP** at room temperature.

**Table S4.** Table of fitting parameters to determine the conductivity of **ZrP** under N<sub>2</sub> atmosphere in various temperatures using ZSimpWin software.

| Temp. (K) | Value of R (Ω) | rel. std. error (%) | Conductivity (Scm <sup>-1</sup> ) | χ <sup>2</sup> value |
|-----------|----------------|---------------------|-----------------------------------|----------------------|
| 293       | 7.33E+09       | 50.92               | 3.10E-11                          | 1.78E-03             |
| 303       | 6.79E+09       | 54.52               | 3.34E-11                          | 3.59E-03             |
| 313       | 5.13E+09       | 45.52               | 4.42E-11                          | 6.43E-03             |
| 323       | 3.28E+09       | 26.23               | 6.92E-11                          | 9.97E-03             |
| 333       | 2.41E+09       | 18.13               | 9.40E-11                          | 2.33E-02             |
| 343       | 1.02E+09       | 11.55               | 2.21E-10                          | 1.62E-02             |
| 353       | 5.51E+08       | 9.179               | 4.12E-10                          | 1.81E-02             |
| 363       | 2.88E+08       | 7.7                 | 7.88E-10                          | 1.87E-02             |

|     |          |       |          |          |
|-----|----------|-------|----------|----------|
| 373 | 2.20E+08 | 10.58 | 1.03E-09 | 6.85E-02 |
| 383 | 8.48E+07 | 6.209 | 2.68E-09 | 1.78E-02 |
| 393 | 4.67E+07 | 5.69  | 4.85E-09 | 1.64E-02 |
| 403 | 2.67E+07 | 5.359 | 8.48E-09 | 1.52E-02 |
| 413 | 1.55E+07 | 5.189 | 1.46E-08 | 1.44E-02 |
| 433 | 5.50E+06 | 6.246 | 4.12E-08 | 1.97E-02 |
| 443 | 3.38E+06 | 7.564 | 6.71E-08 | 2.81E-02 |
| 453 | 2.12E+06 | 9.075 | 1.07E-07 | 3.95E-02 |
| 463 | 1.37E+06 | 10.59 | 1.66E-07 | 5.22E-02 |
| 473 | 8.97E+05 | 12.05 | 2.53E-07 | 6.52E-02 |
| 483 | 5.78E+05 | 13.5  | 3.93E-07 | 7.74E-02 |
| 493 | 2.93E+05 | 15.62 | 7.73E-07 | 8.74E-02 |

**Table S5.** Table of fitting parameters to determine the conductivity of **ZrP** under various RH at room temperature (25 °C) using Gamry Echem Analyst software.

| RH(%) | Value of R1 ( $\Omega$ ) | Error( $\Omega$ ) | Conductivity ( $\text{Scm}^{-1}$ ) | Goodness of Fit |
|-------|--------------------------|-------------------|------------------------------------|-----------------|
| 75    | 8.47E+04                 | 420               | 1.90E-06                           | 3.08E-03        |
| 85    | 1.13E+04                 | 82.01             | 1.42E-05                           | 7.53E-04        |
| 95    | 7.45E+02                 | 3.753             | 2.15E-04                           | 1.33E-04        |
| 98    | 2.17E+01                 | 2.58E-01          | 7.40E-03                           | 1.79E-02        |

**Table S6.** Table of proton conductivity of **ZrP** under 98%RH\_in various temperatures using Gamry Echem Analyst software.

| Temp (K) | Value of R1 ( $\Omega$ ) | Error( $\Omega$ ) | Conductivity ( $\text{Scm}^{-1}$ ) | Goodness of Fit |
|----------|--------------------------|-------------------|------------------------------------|-----------------|
| 298      | 2.18E+01                 | 1.27E-01          | 7.36E-03                           | 1.76E-02        |
| 303      | 1.90E+01                 | 1.94E-01          | 8.45E-03                           | 2.22E-02        |
| 308      | 1.59E+01                 | 8.13E-02          | 1.01E-02                           | 2.72E-02        |
| 313      | 1.24E+01                 | 6.72E-02          | 1.29E-02                           | 4.00E-02        |
| 318      | 8.782                    | 4.97E-02          | 1.83E-02                           | 9.17E-02        |
| 323      | 6.458                    | 4.18E-02          | 2.49E-02                           | 9.17E-02        |
| 328      | 4.888                    | 3.16E-02          | 3.28E-02                           | 1.19E-01        |
| 333      | 3.64                     | 2.44E-02          | 4.41E-02                           | 1.50E-01        |

**Table S7.** List of proton conducting materials reported under high humidity at ambient temperature.

| Compound                                                        | Proton conductivity ( $\text{S cm}^{-1}$ ) | Ea (eV) | Conditions      | Ref |
|-----------------------------------------------------------------|--------------------------------------------|---------|-----------------|-----|
| H <sub>2</sub> SO <sub>4</sub> @MIL-101-SO <sub>3</sub> H (3 M) | 1.82                                       | 0.39    | 70 °C, 90% RH   | 6   |
| BUT-8(Cr)                                                       | $1.27 \times 10^{-1}$                      | 0.11    | 80 °C, 100 % RH | 7   |
| PCMOF2½(Triazole)                                               | $1.17 \times 10^{-1}$                      | 0.22    | 85 °C, 90 % RH  | 8   |
| UiO-66-(SO <sub>3</sub> H) <sub>2</sub>                         | $8.4 \times 10^{-2}$                       | 0.32    | 80 °C, 90 % RH  | 9   |
| Nafion                                                          | $7.8 \times 10^{-2}$                       | 0.22    | 25 °C, 100 % RH | 10  |
| TfOH@MIL-101                                                    | $8.0 \times 10^{-2}$                       | 0.23    | 15 °C, 60 % RH  | 11  |



|                                                                                    |                       |      |                  |           |
|------------------------------------------------------------------------------------|-----------------------|------|------------------|-----------|
| $(\text{NH}_4)_5[\text{Zr}_3(\text{OH})_3\text{F}_6(\text{PO}_4)_2(\text{HPO}_4)]$ | $4.41 \times 10^{-2}$ | 0.33 | 60 °C, 98% RH    | This work |
| $\{[(\text{Me}_2\text{NH}_2)_3(\text{SO}_4)]_2[\text{Zn}(\text{ox})_3]\}_n$        | $4.2 \times 10^{-2}$  | 0.13 | 25 °C, 98 % RH   | 12        |
| PCMOF10                                                                            | $3.6 \times 10^{-2}$  | 0.4  | 70 °C, 95 % RH   | 13        |
| VNU-15                                                                             | $2.9 \times 10^{-2}$  | 0.22 | 95 °C, 60 % RH   | 14        |
| $(\text{NMe}_4\text{-Zn}[\text{HPO}_4][\text{H}_2\text{PO}_4])$                    | $1.30 \times 10^{-2}$ | --   | 60 °C, 98 % RH   | 15        |
| $(\text{NH}_4)_3\text{Zr}(\text{H}_2/3\text{PO}_4)_3$                              | $1.21 \times 10^{-2}$ | 0.30 | 90 °C, 95 % RH   | 16        |
| MIP-202(Zr)                                                                        | $1.10 \times 10^{-2}$ | 0.22 | 90 °C, 95 % RH   | 17        |
| CPM-103a                                                                           | $1.0 \times 10^{-2}$  | 0.66 | 22.5 °C, 75 % RH | 18        |
| UiO-66(Zr)-(CO <sub>2</sub> H) <sub>2</sub>                                        | $2.3 \times 10^{-3}$  | 0.17 | 90 °C, 95 % RH   | 19        |

## References

- [1] Bruker, APEX 2, SAINT, XPREP, Bruker AXS Inc., Madison, Wisconsin, USA, 2007.
- [2] Bruker, SADABS, Bruker AXS Inc., Madison, Wisconsin, USA, 2001.
- [3] G. M. Sheldrick, *Acta Crystallogr., Sect. C: Struct. Chem.*, 2015, **71**, 3–8.
- [4] E. Barsoukov, J.R. Macdonald, *Impedance Spectroscopy: Theory, Experiment, and Applications*, John Wiley & Sons Inc, New York, 2005.
- [5] J.A. Hurd, R. Vaidhyanathan, V. Thangadurai, C.I. Ratcliffe, I.L. Moudrakovski, G.K.H. Shimizu, *Nat. Chem.*, 2009, **705**, 1.
- [6] X.-M. Li, L.-Z. Dong, S.-L. Li, G. Xu, J. Liu, F.-M. Zhang, L.-S. Lu, Y.-Q. Lan, *ACS Energy Letters*, 2017, **2**, 2313-2318.
- [7] F. Yang, G. Xu, Y. Dou, B. Wang, H. Zhang, H. Wu, W. Zhou, J.-R. Li, B. Chen, *Nat. Energy*, 2017, **2**, 877-883.
- [8] S. Kim, B. Joarder, J. A. Hurd, J. Zhang, K. W. Dawson, B. S. Gelfand, N. E. Wong, G. K. H. Shimizu, *J. Am. Chem. Soc.*, 2018, **140**, 1077-1082.
- [9] W. J. P Phang, H. Jo, W. R. Lee, J. H. Song, K. Yoo, B. Kim, C. S. Hong, *Angew. Chem. Int. Ed.*, 2015, **54**, 5142-5146.
- [10] Y. Sone, P. Ekdunge, D. Simonsson, *J. Electrochem. Soc.*, 1996, **143**, 1254-1259.
- [11] D. N. Dybtsev, V. G. Ponomareva, S. B. Aliev, A. P. Chupakhin, M. R. Gallyamov, N. K. Moroz, B. A. Kolesov, K. A. Kovalenko, E. S. Shutova, V. P. Fedin, *ACS Appl. Mater. Inter.*, 2014, **6**, 5161-5167.
- [12] S. S. Nagarkar, S. M. Unni, A. Sharma, S. Kurungot, S. K. Ghosh, *Angew. Chem. Int. Ed.*, 2014, **53**, 2638-2642.
- [13] P. Ramaswamy, N. E. Wong, B. S. Gelfand, G. K. H. Shimizu, *J. Am. Chem. Soc.*, 2015, **137**, 7640-7643.
- [14] T. N. Tu, N. Q. Phan, T. T. Vu, H. L. Nguyen, K. E. Cordova, H. Furukawa, *J. Mater. Chem. A*, 2016, **4**, 3638-3641.

- [15] J.-W. Yu, H.-J. Yu, Q. Ren, J. Zhang, Y. Zou, H.-B. Luo, L. Wang, X.-M. Ren, *Dalton Trans.*, 2021, **50** (23), 8070–8075.
- [16] D. Gui, X. Dai, Z. Tao, T. Zheng, X. Wang, M. A. Silver, J. Shu, L. Chen, Y. Wang, T. Zhang, J. Xie, L. Zou, Y. Xia, J. Zhang, J. Zhang, L. Zhao, J. Diwu, R. Zhou, Z. Chai, S. Wang, *J. Am. Chem. Soc.*, 2018, **140**, 6146–6155.
- [17] S. Wang, M. Wahiduzzaman, L. Davis, A. Tissot, W. Shepard, J. Marrot, C. Martineau-Corcus, D. Hamdane, G. Maurin, S. Devautour-Vinot, C. Serre, *Nat. Commun.* 2018, **9** (1), 4937.
- [18] Q. G. Zhai, C. Mao, X. Zhao, Q. Lin, F. Bu, X. Chen, X. Bu, P. Feng, *Angew. Chem. Int. Ed.*, 2015, **54**, 7886-7890.
- [19] D. D. Borges, S. Devautour-Vinot, H. Jobic, J. Ollivier, F. Nouar, R. Semino, T. Devic, C. Serre, F. Paesani, G. Maurin, *Angew. Chem. Int. Ed.*, 2016, **128**, 3987-3992.
